# Supplementary material for: Vertical Distribution of Total Mercury and Mercury Methylation in a Landfill Site in Japan
Source: MDPI journal article supplement (doi:10.3390/ijerph15061252), 2018-06-13
Supplement: s1 [file s1]

Table S1 Characteristics and compositions of waste in core samples

| Sample number | color                              | speciaes                      | characteristic                        |
|---------------|------------------------------------|-------------------------------|---------------------------------------|
| Core 1-1      | yellow light brown and little gray | loess                         | uniform and dry                       |
| Core 1-2      | gray and yellow                    | clay                          | small block existing and compact      |
| Core 1-3      | black                              | fine,uniform sand             | loose and little water                |
| Core 1-4      | brown                              | sand and stones               | much water                            |
| Core 1-5      | gray and concrete color            | mud and small stones          | much water                            |
| Core 1-6      | gray and concrete color            | small block                   | little water and compact              |
| Core 1-7      | dark black                         | coarse sand                   | broken plastics block and fibre       |
| Core 1-8      | gray and brown                     | unbreakable block             | little plant                          |
| Core 1-9      | black                              | sand                          | loose and uniform                     |
| Core 1-10     | gray and concrete color            | block and stones              | solid                                 |
| Core 1-11     | gray                               | sand                          | loose                                 |
| Core 1-12     | gray                               | big stone and broken glass    | much water                            |
| Core 1-13     | gray                               | coarse sand and small sand    | day and plastics bag existing         |
| Core 1-14     | black                              | mud and cotton-like           | many plants and much water            |
| Core 1-15     | dark brown                         | only clay, no other object    | loose and fine                        |
| Core 1-16     | brown                              | sand                          | loose and little water                |
| Core 2-1      | brown                              | small stone and clay          | solid block                           |
| Core 2-2      | half gray and half brown           | half clay and half sand       | soft                                  |
| Core 2-3      | black (and white chemical)         | fine sand                     | loose and plastics existing           |
| Core 2-4      | black                              | big stone and coarse sand     | much water                            |
| Core 2-5      | black                              | little soil and much plactics | much water                            |
| Core 2-6      | black                              | coarse sand                   | much water and plactics bags existing |
| Core 2-7      | dark gray                          | coarse sand                   | water existing and no ropiniss        |
| Core 2-8      | gray                               | coarse sand                   | loose and wire-like object existing   |

|           |                          |                             |                                               |
|-----------|--------------------------|-----------------------------|-----------------------------------------------|
| Core 2-9  | dark gray                | sand                        | loose and plants existing                     |
| Core 2-10 | gray                     | small stone                 | loose, much water and plants existing         |
| Core 2-11 | black                    | stone and glass             | wire and lamp of soil                         |
| Core 2-12 | black                    | small stones                | blue plastic bags and yellow plastic fragment |
| Core 2-13 | gray and green           | small stones and clay       | plenty of plants                              |
| Core 2-14 | brown                    | stone and clay              | metal slice existing                          |
| Core 2-15 | gray and yellow          | many stones                 | humid                                         |
| Core 2-16 | black                    | small particle and no stone | uniform                                       |
| Core 2-17 | black to gray            | humus                       | root and leaves existing                      |
| Core 2-18 | yellow                   | all sand and small stones   | much water and different size of stone        |
| Core 3-1  | black                    | small stones                | plastic bags                                  |
| Core 3-2  | dark gray                | very fine sand              | uniform                                       |
| Core 3-3  | black                    | fine particles              | no big object                                 |
| Core 3-4  | black and brown          | sand existing and ropiness  | broken glass                                  |
| Core 3-5  | black                    | clay                        | much water, fine and small quantity of grass  |
| Core 3-6  | black                    | clay                        | humid and fibre of plants existing            |
| Core 3-7  | black to gray            | fine sand                   | withered grass and silver metal block         |
| Core 3-8  | black                    | humus                       | wood and fibre of plants existing             |
| Core 3-9  | yellow to golden         | clay                        | solid and small stone and grass existing      |
| Core 3-10 | gray and yellow          | stone and mud               | much water                                    |
| Core 3-11 | brick color and dark red | sand                        | uniform, loose and much water                 |

Table S2. Ratio of hgcA, merA and merB to 16S rRNA in three cores

| Sample number | hgcA/16SrRNA | merA/16SrRNA | merB/16SrRNA |
|---------------|--------------|--------------|--------------|
| Core 1-1      | 5.85E-02     | 6.88E-03     | 8.91E-11     |
| Core 1-2      | 1.23E-02     | 1.09E-02     | 1.48E-07     |
| Core 1-3      | 8.80E-04     | 4.49E-03     | 1.21E-06     |
| Core 1-4      | -            | -            | -            |
| Core 1-5      | 3.31E-03     | 1.52E-03     | 2.63E-09     |
| Core 1-6      | -            | -            | -            |
| Core 1-7      | 1.56E-03     | 1.78E-03     | 8.70E-06     |
| Core 1-8      | 7.41E-03     | 0.00E+00     | 1.13E-05     |
| Core 1-9      | 1.42E-03     | 2.14E-03     | 4.62E-06     |
| Core 1-10     | -            | -            | -            |
| Core 1-11     | 4.99E-05     | 3.13E-03     | 3.24E-07     |
| Core 1-12     | 1.51E-04     | 1.38E-02     | 4.62E-04     |
| Core 1-13     | -            | -            | -            |
| Core 1-14     | 4.40E-04     | 2.21E-03     | 1.10E-06     |
| Core 1-15     | 3.54E-04     | 5.15E-02     | 5.52E-09     |
| Core 1-16     | 7.09E-03     | 2.68E-03     | 1.48E-06     |
| Core 2-1      | 2.49E-02     | 6.19E-03     | 2.45E-07     |
| Core 2-2      | 3.32E-02     | 1.35E-02     | 4.86E-07     |
| Core 2-3      | 2.29E-03     | 3.86E-03     | 9.67E-07     |
| Core 2-4      | 4.11E-03     | 7.87E-08     | 1.07E-03     |
| Core 2-5      | 5.50E-04     | 1.43E-03     | 3.29E-08     |
| Core 2-6      | -            | -            | -            |
| Core 2-7      | 7.52E-04     | 3.77E-03     | 2.32E-07     |
| Core 2-8      | -            | -            | -            |
| Core 2-9      | 4.69E-04     | 3.97E-03     | 1.63E-06     |
| Core 2-10     | -            | -            | -            |
| Core 2-11     | 4.90E-04     | 5.45E-03     | -            |
| Core 2-12     | 1.15E-02     | 0.00E+00     | 6.20E-04     |
| Core 2-13     | -            | 8.62E-03     | -            |
| Core 2-14     | -            | -            | -            |
| Core 2-15     | -            | -            | -            |
| Core 2-16     | 5.08E-06     | 1.89E-02     | -            |
| Core 2-17     | 1.14E-03     | 9.18E-03     | 2.38E-08     |
| Core 2-18     | 1.26E-03     | 2.43E-03     | 6.99E-05     |
| Core 3-1      | -            | -            | -            |
| Core 3-2      | 1.70E-02     | 7.05E-03     | 1.34E-08     |
| Core 3-3      | -            | -            | -            |
| Core 3-4      | 3.35E-03     | 7.60E-03     | 3.58E-05     |
| Core 3-5      | -            | -            | -            |
| Core 3-6      | 7.81E-03     | 1.08E-02     | 1.67E-05     |
| Core 3-7      | 1.28E-03     | 4.58E-03     | 1.67E-06     |
| Core 3-8      | 5.85E-04     | 1.21E-02     | 1.71E-07     |

|           |          |          |          |
|-----------|----------|----------|----------|
| Core 3-9  | 1.00E-02 | 3.09E-06 | 2.61E-04 |
| Core 3-10 | 5.87E-02 | 5.15E-02 | 9.15E-06 |
| Core 3-11 | 9.99E-03 | 1.85E-02 | 1.71E-04 |

---

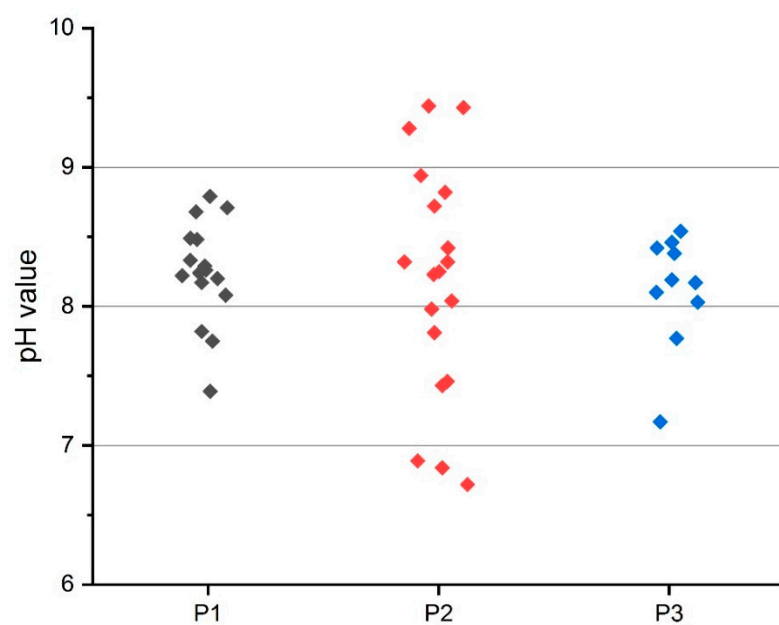

Figure S1. pH value of samples in three cores
